# Supplementary material
Source: HighWire-hosted journal article supplement (https://bmjopen.bmj.com/content/10/3/e033999)
Supplement: inline-supplementary-material-1 [file inline-supplementary-material-1.pdf]

**APPENDIX 2: TRIAL REGISTRATION—DATA SET**

|                         |                                                                                                                                                                                                                                                                                                                                                                                                                                                                                                                                                                                                                        |
|-------------------------|------------------------------------------------------------------------------------------------------------------------------------------------------------------------------------------------------------------------------------------------------------------------------------------------------------------------------------------------------------------------------------------------------------------------------------------------------------------------------------------------------------------------------------------------------------------------------------------------------------------------|
| NCT Number              | NCT03545373                                                                                                                                                                                                                                                                                                                                                                                                                                                                                                                                                                                                            |
| Title                   | Accuracy and Consequences of Using Trial-of-antibiotics for TB Diagnosis (ACT-TB Study)                                                                                                                                                                                                                                                                                                                                                                                                                                                                                                                                |
| Acronym                 | ACT-TB                                                                                                                                                                                                                                                                                                                                                                                                                                                                                                                                                                                                                 |
| Status                  | Recruiting                                                                                                                                                                                                                                                                                                                                                                                                                                                                                                                                                                                                             |
| Study Results           | No Results Available                                                                                                                                                                                                                                                                                                                                                                                                                                                                                                                                                                                                   |
| Conditions              | Tuberculosis Respiratory Tract Infections Pneumonia                                                                                                                                                                                                                                                                                                                                                                                                                                                                                                                                                                    |
| Interventions           | Drug: Azithromycin Drug: Amoxicillin                                                                                                                                                                                                                                                                                                                                                                                                                                                                                                                                                                                   |
| Outcome Measures        | Diagnostic accuracy of trial-of-antibiotics: Proportion of participants correctly classified as PTB negative based on report of improvement of baseline symptoms on study Day-8 against a mycobacteriology reference standard. Overall clinical benefit of empirical antibiotic treatment in primary care participants with chronic cough: proportion of participants experiencing adverse clinical outcomes Impact of trial-of-antibiotics on antimicrobial resistance Diagnostic accuracy of trial-of-antibiotics including participants who did not produce sputum Economic analysis of use of trial-of-antibiotics |
| Sponsor/Collaborators   | London School of Hygiene and Tropical Medicine University of Malawi College of Medicine                                                                                                                                                                                                                                                                                                                                                                                                                                                                                                                                |
| Gender                  | All                                                                                                                                                                                                                                                                                                                                                                                                                                                                                                                                                                                                                    |
| Age                     | 18 Years and older Å (Adult, Older Adult)                                                                                                                                                                                                                                                                                                                                                                                                                                                                                                                                                                              |
| Phases                  | Phase 3                                                                                                                                                                                                                                                                                                                                                                                                                                                                                                                                                                                                                |
| Enrollment              | 1875                                                                                                                                                                                                                                                                                                                                                                                                                                                                                                                                                                                                                   |
| Funded Bys              | Other                                                                                                                                                                                                                                                                                                                                                                                                                                                                                                                                                                                                                  |
| Study Type              | Interventional                                                                                                                                                                                                                                                                                                                                                                                                                                                                                                                                                                                                         |
| Study Designs           | Allocation: Randomized<br>Intervention Model: Parallel Assignment<br>Masking: Single (Outcomes Assessor)<br>Primary Purpose: Diagnostic                                                                                                                                                                                                                                                                                                                                                                                                                                                                                |
| Other IDs               | 15232                                                                                                                                                                                                                                                                                                                                                                                                                                                                                                                                                                                                                  |
| Start Date              | February 25, 2019                                                                                                                                                                                                                                                                                                                                                                                                                                                                                                                                                                                                      |
| Primary Completion Date | Jun-20                                                                                                                                                                                                                                                                                                                                                                                                                                                                                                                                                                                                                 |
| Completion Date         | Jun-20                                                                                                                                                                                                                                                                                                                                                                                                                                                                                                                                                                                                                 |
| First Posted            | June 4, 2018                                                                                                                                                                                                                                                                                                                                                                                                                                                                                                                                                                                                           |
| Results First Posted    |                                                                                                                                                                                                                                                                                                                                                                                                                                                                                                                                                                                                                        |
| Last Update Posted      | August 15, 2019                                                                                                                                                                                                                                                                                                                                                                                                                                                                                                                                                                                                        |
| Locations               | University of Malawi College of Medicine, Blantyre, Southern, Malawi                                                                                                                                                                                                                                                                                                                                                                                                                                                                                                                                                   |
| Study Documents         |                                                                                                                                                                                                                                                                                                                                                                                                                                                                                                                                                                                                                        |
| URL                     | <a href="https://ClinicalTrials.gov/show/NCT03545373">https://ClinicalTrials.gov/show/NCT03545373</a>                                                                                                                                                                                                                                                                                                                                                                                                                                                                                                                  |
